# Supplementary material for: Producer and Veterinarian Perspectives towards Pain Management Practices in the US Cattle Industry
Source: PubMed Central journal article supplement (PMC7830793; doi:10.3390/ani11010209), 2021-01-16
Supplement: animals-11-00209-s001.pdf [file animals-11-00209-s001.pdf]

## Supplementary Materials (S1): Cattle Pain Management Survey

### Q1 Where is your operation located?

|                                                |                                           |                                                                 |
|------------------------------------------------|-------------------------------------------|-----------------------------------------------------------------|
| <input type="radio"/> Alabama (1)              | <input type="radio"/> Kentucky (18)       | <input type="radio"/> Ohio (36)                                 |
| <input type="radio"/> Alaska (2)               | <input type="radio"/> Louisiana (19)      | <input type="radio"/> Oklahoma (37)                             |
| <input type="radio"/> Arizona (3)              | <input type="radio"/> Maine (20)          | <input type="radio"/> Oregon (38)                               |
| <input type="radio"/> Arkansas (4)             | <input type="radio"/> Maryland (21)       | <input type="radio"/> Pennsylvania (39)                         |
| <input type="radio"/> California (5)           | <input type="radio"/> Massachusetts (22)  | <input type="radio"/> Puerto Rico (40)                          |
| <input type="radio"/> Colorado (6)             | <input type="radio"/> Michigan (23)       | <input type="radio"/> Rhode Island (41)                         |
| <input type="radio"/> Connecticut (7)          | <input type="radio"/> Minnesota (24)      | <input type="radio"/> South Carolina (42)                       |
| <input type="radio"/> Delaware (8)             | <input type="radio"/> Mississippi (25)    | <input type="radio"/> South Dakota (43)                         |
| <input type="radio"/> District of Columbia (9) | <input type="radio"/> Missouri (26)       | <input type="radio"/> Tennessee (44)                            |
| <input type="radio"/> Florida (10)             | <input type="radio"/> Montana (27)        | <input type="radio"/> Texas (45)                                |
| <input type="radio"/> Georgia (11)             | <input type="radio"/> Nebraska (28)       | <input type="radio"/> Utah (46)                                 |
| <input type="radio"/> Hawaii (12)              | <input type="radio"/> Nevada (29)         | <input type="radio"/> Vermont (47)                              |
| <input type="radio"/> Idaho (13)               | <input type="radio"/> New Hampshire (30)  | <input type="radio"/> Virginia (48)                             |
| <input type="radio"/> Illinois (14)            | <input type="radio"/> New Jersey (31)     | <input type="radio"/> Washington (49)                           |
| <input type="radio"/> Indiana (15)             | <input type="radio"/> New Mexico (32)     | <input type="radio"/> West Virginia (50)                        |
| <input type="radio"/> Iowa (16)                | <input type="radio"/> New York (33)       | <input type="radio"/> Wisconsin (51)                            |
| <input type="radio"/> Kansas (17)              | <input type="radio"/> North Carolina (34) | <input type="radio"/> Wyoming (52)                              |
|                                                | <input type="radio"/> North Dakota (35)   | <input type="radio"/> I do not reside in the United States (53) |

West: WA (49), OR (38), CA(5), NV(29), UT(46), ID(13), MT(27), WY(52), CO(6)

Southwest: AZ(3), NM(32), TX(45), OK(37),

Midwest: ND(35), SD(43), NE(28), KS(17), MN(24), IA(16), MO(26), WI(51), IL(14), IN(15), MI(23), OH(36)

Southeast: AR(4), LA(19), MS(25), AL(1), TN(44), KY(18), GA(11), FL(10), SC(42), NC(34), WV(50), VA(48), DC(9), MD(21), DE(8)

Northeast: NJ(31), PA(39), RI(41), CT(7), NY(33), MA(22), VT(47), NH(30), ME(20)

### Q2 Are you?

- Male (1)
- Female (2)

### Q3 Which of the following best describes your involvement with the cattle industry? (Select all that apply.)

- Producer (beef or dairy) (3)
- Veterinarian (2)
- Other (please specify): (1) \_\_\_ = Both vet and producer\_\_\_\_\_

### Q7 How old are you?

- Under 20 (1)
- 21 to 30 (2)
- 31 to 40 (3)
- 41 to 50 (4)
- 51 to 60 (5)
- 61 to 70 (6)
- 1 (7)

*Display This Question: If Q3 = Producer (beef or dairy)*

**Q9 What is the highest degree or level of school you have completed? If currently enrolled, highest degree received.**

- Did not complete high school (1)
- High School (2)
- Some College, no degree (3)
- Trade/technical/vocational training (4)
- Associate Degree (5)
- Bachelor's Degree (6)
- Master's Degree (7)
- Professional Degree (JD, MD) (8)
- Doctorate Degree (PhD) (9)

*Display This Question: If Q3 = Veterinarian*

**Q10 When did you graduate from veterinary school?**

- Prior to 1970 (1)
- 1970-1980 (2)
- 1981-1990 (3)
- 1991-2000 (4)
- 2001-2010 (5)
- 2011-2018 (6)

**Q21 Which pain relief drugs (analgesics) do you have knowledge of and feel comfortable using in your operation or practice?  
(Select all that apply.)**

- Lidocaine (1)
- Oral Meloxicam (2)
- Meloxicam Injection (Metacam® Injection) (3)
- Flunixin (e.g. Banamine®) Injection (4)
- Flunixin (e.g. Banamine®) pour-on (5)
- Aspirin (6)
- Phenylbutazone (7)
- Ketoprofen (Anafen® Injection) (8)
- Other (please specify): (9) \_\_\_\_\_
- None of these (10)

**Q25 How important are the following factors in impacting your decision to use an analgesic drug in adult cattle and calves?**

|                                                        | Not at all important (1) | Slightly important (2) | Moderately important (3) | Very important (4)    | Extremely important (5) |
|--------------------------------------------------------|--------------------------|------------------------|--------------------------|-----------------------|-------------------------|
| FDA Approval status (1)                                | <input type="radio"/>    | <input type="radio"/>  | <input type="radio"/>    | <input type="radio"/> | <input type="radio"/>   |
| Cost of the drug (2)                                   | <input type="radio"/>    | <input type="radio"/>  | <input type="radio"/>    | <input type="radio"/> | <input type="radio"/>   |
| Recommendation of veterinarian (Producers only)        | <input type="radio"/>    | <input type="radio"/>  | <input type="radio"/>    | <input type="radio"/> | <input type="radio"/>   |
| Lack of sedative effect (4)                            | <input type="radio"/>    | <input type="radio"/>  | <input type="radio"/>    | <input type="radio"/> | <input type="radio"/>   |
| Duration of Pain Control/ Analgesic effect of drug (5) | <input type="radio"/>    | <input type="radio"/>  | <input type="radio"/>    | <input type="radio"/> | <input type="radio"/>   |
| Ease of administration (6)                             | <input type="radio"/>    | <input type="radio"/>  | <input type="radio"/>    | <input type="radio"/> | <input type="radio"/>   |
| Short Withhold Period (7)                              | <input type="radio"/>    | <input type="radio"/>  | <input type="radio"/>    | <input type="radio"/> | <input type="radio"/>   |
| Animal's ability to feel pain (8)                      | <input type="radio"/>    | <input type="radio"/>  | <input type="radio"/>    | <input type="radio"/> | <input type="radio"/>   |
| Improving Safety of the caregiver/ operator (9)        | <input type="radio"/>    | <input type="radio"/>  | <input type="radio"/>    | <input type="radio"/> | <input type="radio"/>   |
| Improved production outcomes (10)                      | <input type="radio"/>    | <input type="radio"/>  | <input type="radio"/>    | <input type="radio"/> | <input type="radio"/>   |
| How painful I consider the procedure to be (11)        | <input type="radio"/>    | <input type="radio"/>  | <input type="radio"/>    | <input type="radio"/> | <input type="radio"/>   |
| Time of onset of drug activity (12)                    | <input type="radio"/>    | <input type="radio"/>  | <input type="radio"/>    | <input type="radio"/> | <input type="radio"/>   |
| Request of producer (Veterinarians only)               | <input type="radio"/>    | <input type="radio"/>  | <input type="radio"/>    | <input type="radio"/> | <input type="radio"/>   |

**Q30 How has your use of analgesics changed in the last 10 years?**

- Increased use (1)
- Stayed the same (2)
- Decreased use (3)

*Display This Question: If Q30 = Increased use*

**Q31 Why has your use of analgesics increased? (Select all that apply.)**

- New evidence of analgesic effectiveness (1)
- Requirement of a quality assurance program (2)
- Decreased prices for analgesics (3)
- Change in your perception of pain in cattle (4)
- Changing farmer or veterinarian attitudes (5)
- Change in practice or operation protocols (6)
- Influence from colleagues/fellow producers (7)
- Mandated by a retailer or packer (8)
- Maintain consumer confidence in livestock production practices (9)
- Cattle that receive analgesia look better than cattle that don't (10)
- Cattle that receive analgesia have improved health and performance (11)

Display This Question: If Q30 = Decreased use

**Q32 Why has your use of analgesics decreased? (Select all that apply.)**

- Currently available analgesic drugs are not effective at reducing pain (1)
- Currently available analgesic drugs are inconvenient to administer (2)
- Currently available analgesic drugs do not last long enough after 1 dose to justify their use (3)
- Currently available analgesic drugs are too expensive (4)
- I do not know the meat and milk withhold periods for the analgesic drugs (5)
- Currently available drugs do not improve health and performance (6)
- I am not comfortable using an analgesic unless it has been approved by FDA (7)

**Q37 Do you consider that your knowledge about recognizing and treating pain in adult cattle and calves is adequate?**

- Yes (1)
- No (2)

**Q38 Where do you feel you have obtained most of your knowledge about recognizing and treating pain in adult cattle and calves? \*\*Remnant adapted**

- FFA/ 4-H training (1)
- College classes (2)
- Journals / articles (3)
- Continuing education (4)
- Personal Experience (5)
- Online training modules (6)
- Commercial literature / data sheets (7)
- Other (please specify): (8) \_\_\_\_\_

Display This Question: If Q3 = Veterinarian

**Q39 Does the type of illness or procedure affect the likelihood of using a specific analgesic drug in the cattle you treat?**

- Yes (1)
- No (2)

Display This Question: If Q39 = No

**Q40 How likely are you to consider using the following analgesic drugs in cattle?**

|                                   | Extremely unlikely (1) | Somewhat unlikely (2) | Neither likely nor unlikely (3) | Somewhat likely (4)   | Extremely likely (5)  |
|-----------------------------------|------------------------|-----------------------|---------------------------------|-----------------------|-----------------------|
| Lidocaine (1)                     | <input type="radio"/>  | <input type="radio"/> | <input type="radio"/>           | <input type="radio"/> | <input type="radio"/> |
| Oral Meloxicam (2)                | <input type="radio"/>  | <input type="radio"/> | <input type="radio"/>           | <input type="radio"/> | <input type="radio"/> |
| Meloxicam Injection (3)           | <input type="radio"/>  | <input type="radio"/> | <input type="radio"/>           | <input type="radio"/> | <input type="radio"/> |
| Flunixin (Banamine) Injection (4) | <input type="radio"/>  | <input type="radio"/> | <input type="radio"/>           | <input type="radio"/> | <input type="radio"/> |
| Flunixin (Banamine) pour-on (5)   | <input type="radio"/>  | <input type="radio"/> | <input type="radio"/>           | <input type="radio"/> | <input type="radio"/> |
| Aspirin (6)                       | <input type="radio"/>  | <input type="radio"/> | <input type="radio"/>           | <input type="radio"/> | <input type="radio"/> |
| Phenylbutazone (7)                | <input type="radio"/>  | <input type="radio"/> | <input type="radio"/>           | <input type="radio"/> | <input type="radio"/> |
| Ketoprofen (8)                    | <input type="radio"/>  | <input type="radio"/> | <input type="radio"/>           | <input type="radio"/> | <input type="radio"/> |
| Other (please specify): (9)       | <input type="radio"/>  | <input type="radio"/> | <input type="radio"/>           | <input type="radio"/> | <input type="radio"/> |
